# Supplementary material for: A Meta-Analysis of the Association Between Birth Weight and Attention Deficit Hyperactivity Disorder
Source: Springer Nature journal article supplement (doi:10.1007/s10802-017-0371-9), 2017-11-21
Supplement: MOESM1 [file 15244838]

Appendix 1. *Unadjusted studies included in the meta-analysis.*

*Study N Sample Geographic Measure Informant Birth Weight Age Birth*

*Type Region Type Source (years) Weight (g)*

Adger-Antonikowski, 2009 68 BW N. America Questionnaire Parent Parent report 4.3 1497

Anderson et al., 2011 362 BW Australia/NZ Questionnaire Parent Medical record 8.1 2111

Anderson et al., 2003 498 BW Australia/NZ Questionnaire Parent Medical record 8.8 2014

Andreias et al., 2010 359 BW N. America Questionnaire Parent Medical record 8 2031

Asbury et al., 2006 938 Community Europe Questionnaire Teacher Parent report 7 ---

Asbury et al., 2006 1104 Community Europe Questionnaire Teacher Parent report 7 ---

Beverly et al., 2008 45 Community N. America Questionnaire Parent Medical record 11 ---

Bora et al., 2011 212 BW Australia/NZ --- Multiple Medical record 6 2343

Botting et al., 1997 284 BW Europe Interview Parent Medical record 12 ---

Boulet et al., 2011 87,578 Population N. America Medical record Parent Parent report --- ---

Breeman et al., 2016 488 BW Europe Interview Parent Parent report 7 2275

Breslau et al., 1996 414 BW N. America --- Multiple Medical record 6 ---

Breslau et al., 1996 409 BW N. America --- Multiple Medical record 6 ---

Chu et al., 2012 407 ADHD Asia Medical record Clinician Medical record 9 3186

Class et al., 2014 3,292,773 Population Europe Medical record Clinical Medical record --- ---

*Appendix 1 continued.*

*Study N Sample Geographic Measure Informant Birth Weight Age Birth*

*Type Region Type Source (years) Weight (g)*

Conrad, Richman, Lindgren, 104 BW N. America --- Multiple Medical record 11.5 2365

& Nopoulos, 2010

Crea et al., 2014 449 Community N. America Questionnaire Parent Parent report 16.7 3161

Davis, Burns, Snyder, 94 BW N. America Questionnaire Parent Medical record 5.3 1010

& Robinson, 2007

de Zeeuw et al., 2012 88 ADHD Europe Interview Parent Parent report 10 3493

Duris, 2002 117 BW N. America Medical record Clinician Parent report 8 2316

Elgen et al., 2013 268 BW Europe Interview --- --- 19 ---

Emond et al., 2008 164 BW S. America --- Multiple Medical record 8.2 2774

Fazio, 2012 588 ADHD N. America Interview Parent --- 8.5 ---

Frederick, 2012 50 Community N. America Questionnaire --- --- --- 3500

Galera et al., 2011 1665 Community N. America Questionnaire Parent Medical record --- ---

Groen-Blokhuis 6631 Population Europe Questionnaire Parent Parent report 3 ---

et al., 2011

Groen-Blokhuis 6661 Population Europe Questionnaire Parent Parent report 3 ---

et al., 2011

Grunau et al., 2004 84 BW N. America Questionnaire Parent --- 17.5 1748

*Appendix 1 continued.*

*Study N Sample Geographic Measure Informant Birth Weight Age Birth*

*Type Region Type Source (years) Weight (g)*

Hack et al., 2004 207 BW N. America Questionnaire Parent Medical record 20 ---

Hack et al., 2004 235 BW N. America Questionnaire Parent Medical record 20 ---

Halmoy, Klungsoyr, 1,150,705 ADHD Europe Medical record Clinician Medical record --- ---

Skjaerven, & Haavik, 2012

Hanc et al., 2015 615 ADHD Europe Medical record Clinician Medical record 10.5 3383

Hanke et al., 2003 136 BW Europe Questionnaire Parent Medical Record 6.2 ---

Hatch, Healey, & 197 Community N. America --- Multiple Parent report 4.3 3288

Halperin, 2014

Huang et al., 2012 84 BW Asia Questionnaire Parent --- --- ---

Hultman et al., 2007 1055 Population Europe Questionnaire Parent Medical record 8.5 ---

Hultman et al., 2007 1066 Population Europe Questionnaire Parent Medical record 8.5 ---

Indredavik et al., 2010 146 BW Europe Interview Parent Medical record 14 2753

Jaspers et al., 2013 1664 ADHD Europe Questionnaire Parent Medical record --- ---

Johnson-Kramer, 1999 36 BW N. America Medical record Clinician Medical record 10.4 1787

Kadziela-Olech & 100 ADHD Europe Questionnaire Parent Parent report 7.4 ---

Piotrowska-Jastrzebska, 2005

*Appendix 1 continued.*

*Study N Sample Geographic Measure Informant Birth Weight Age Birth*

*Type Region Type Source (years) Weight (g)*

Knopik et al., 2005 5,872 Population N. America Interview Parent Parent report 14.4 ---

Kreppner, O’Connor, 214 Community Europe --- Multiple Medical record 6 ---

& Rutter, 2001

Lahti et al., 2006 267 Community Europe Questionnaire Parent Medical record --- 3573

Langley et al., 2007 356 ADHD Europe Interview Parent Parent report 9.2 3286

Linnet et al., 2005 4,105 Population Europe Medical record Clinician --- --- ---

McCormick, Gortmaker, 10,522 Population N. America Questionnaire Parent Parent report --- ---

& Sobol, 1990

McGrath et al., 2005 184 BW N. America Questionnaire Parent Medical record 4 1742

Melchior et al., 2015 1,113 Community Europe Questionnaire Parent Medical record 5 ---

Mick et al., 2002 483 ADHD N. America Interview Parent Parent report 11.7 ---

Minde, Webb, & Sykes, 112 ADHD N. America Medical record Clinician Medical record 9.8 3250

1968

Mitchell, Aman, Turbott, 97 ADHD Australia/NZ --- Multiple Parent report 8.9 3236

& Manku, 1987

Momany et al., 2016 773 ADHD N. America --- Multiple Parent report 12.3 3398

*Appendix 1 continued.*

*Study N Sample Geographic Measure Informant Birth Weight Age Birth*

*Type Region Type Source (years) Weight (g)*

Morales, Polizzi, Sulliotti, 120 BW Europe Questionnaire Parent Parent report 5.2 2463

Mascolino, & Perricone, 2013

Murray et al., 2015 3,748 Population S. America Questionnaire Parent Medical record 4 ---

Nosarti, Allin, Frangou, 116 BW Europe Questionnaire Parent Medical record 15 2300

Rifkin, & Murray, 2005

O’Callaghan & Harvey, 1997 87 BW Australia/NZ --- Multiple Medical record 10.7 860

Offord, Sullivan, Allen, 63 ADHD N. America Interview Parent --- 12.5 3315

& Abrams, 1979

Parker, Collett, Speltz, & 489 Community N. America Questionnaire Multiple Parent report 7 3429

Werler, 2016

Perkinson-Gloor et al., 2015 105 BW Europe Questionnaire Parent --- 8.3 2235

Razza et al., 2016 751 Community N. America Questionnaire Teacher Medical record 6 ---

Rice et al., 2010 779 Community --- Questionnaire Parent --- 6.7 3074

Rickards, Kelly, Doyle, 161 BW Australia/NZ Questionnaire Teacher Medical record 14 1740

& Callanan, 2001

Ross, Lipper, & Auld, 1992 168 BW N. America Medical record Clinician --- 7.5 ---

Sasaluxnanon & 241 ADHD Asia --- Multiple Parent report 8.8 ---

Kaewpornsawan, 2005

*Appendix 1 continued.*

*Study N Sample Geographic Measure Informant Birth Weight Age Birth*

*Type Region Type Source (years) Weight (g)*

Sato et al., 2004 80 BW Asia Medical record Clinician Medical record 5 1812

Schmitz et al., 2006 200 ADHD S. America Interview Parent Parent report 11.8 3305

Sciberras, Ukoumunne, 4,464 Community Australia/NZ Questionnaire Parent Parent report 6.8 ---

& Efron, 2011

Scott et al., 2012 259 BW N. America Interview Parent Parent report 6 1917

Sengupta et al., 2006 191 ADHD N. America Medical record Clinician Parent report 9 ---

Simonds & Aston, 1980 106 BW N. America Interview Parent Medical record --- ---

Smith et al., 2014 398 ADHD --- Questionnaire Parent --- 10.7 3389

St. Sauver et al., 2004 5,631 Population N. America Medical record Clinician Medical record --- ---

Strang-Karlsson et al., 2008 334 BW Europe Questionnaire --- Medical record 22.5 2396

Sullivan, Msall, & Miller, 180 BW N. America Medical record Clinician Medical record 17.1 1805

2012

Sykes et al., 1997 260 BW Europe Questionnaire Teacher Medical record 7.4 ---

Sykes et al., 1997 182 BW Europe Questionnaire Teacher Medical record 7.4 ---

Szatmari, Saigal, Rosenbaum, 274 BW N. America --- Multiple Parent report 8 2163

& Campbell, 1993

*Appendix 1 continued.*

*Study N Sample Geographic Measure Informant Birth Weight Age Birth*

*Type Region Type Source (years) Weight (g)*

Taylor, Klein, Minich, 164 BW N. America Medical record Clinician Medical record 11.1 ---

& Hack, 2000

Van den Bergh & 72 Community Europe --- Multiple Medical record 8.5 3301

Marcoen, 2004

Van Hus, Potharst, 165 BW Europe --- Multiple Medical record 5.2 2285

Jeukens-Visser, Kok, &

Van Wassenear-Leemhuis,

2014

Wagner, Schmidt, 748 Community N. America --- Parent Medical record 8.1 2503

Lemery-Chalfant, Leavitt,

& Goldsmith, 2009

Wiles et al., 2006 5,333 Community Europe Questionnaire Parent Medical record 6.8 3470

Williams, 2010 771 BW N. America Questionnaire Parent Medical record --- 2292

Yang, Chen, Yen, & Chen, 61 BW Asia Interview Parent Medical record 13.4 1208

2015

*Appendix 1 continued.*

*Study N Male Caucasian Non-Caucasian Gestational Age Tobacco*

*(%) (%) (%) (weeks) (%)*

Adger-Antonikowski, 2009 68 41 83 10 34 ---

Anderson et al., 2011 362 53 --- --- 33 ---

Anderson et al., 2003 498 47 --- --- 32 ---

Andreias et al., 2010 359 38 --- --- --- ---

Asbury et al., 2006 938 100 --- --- --- ---

Asbury et al., 2006 1104 0 --- --- --- ---

Beverly et al., 2008 45 44 --- --- --- ---

Bora et al., 2011 212 53 --- --- 34 ---

Botting et al., 1997 284 65 --- --- --- ---

Boulet et al., 2011 87,578 51 78 15 --- ---

Breeman et al., 2016 488 50 --- --- --- ---

Breslau et al., 1996 414 44 23 77 --- 35

Breslau et al., 1996 409 53 92 8 --- 27

Chu et al., 2012 407 79 --- --- 38 ---

Class et al., 2014 3,292,773 52 --- --- 40 ---

*Appendix 1 continued.*

*Study N Male Caucasian Non-Caucasian Gestational Age Tobacco*

*(%) (%) (%) (weeks) (%)*

Conrad, Richman, Lindgren, 104 51 88 --- --- ---

& Nopoulos, 2010

Crea et al., 2014 449 51 55 32 --- ---

Davis, Burns, Snyder, 94 44 70 20 28 ---

& Robinson, 2007

de Zeeuw et al., 2012 88 86 --- --- 40 17

Duris et al., 2002 117 51 52 48 35 ---

Elgen et al., 2013 268 --- --- --- --- ---

Emond et al., 2008 164 --- --- --- 39 ---

Fazio, 2012 588 70 90 --- --- 26

Frederick, 2012 50 100 --- --- --- ---

Galera et al., 2011 1665 51 --- --- --- ---

Groen-Blokhuis 6631 0 --- --- --- ---

et al., 2011

Groen-Blokhuis 6661 100 --- --- --- ---

et al., 2011

Grunau et al., 2004 84 60 --- --- 31 ---

*Appendix 1 continued.*

*Study N Male Caucasian Non-Caucasian Gestational Age Tobacco*

*(%) (%) (%) (weeks) (%)*

Hack et al., 2004 207 100 --- --- --- ---

Hack et al., 2004 235 0 --- --- --- ---

Halmoy, Klungsoyr, 1,150,705 51 --- --- --- ---

Skjaerven, & Haavik, 2012

Hanc et al., 2015 615 100 --- --- --- ---

Hanke et al., 2003 136 45 --- --- --- ---

Hatch, Healey, & 197 74 40 42 --- ---

Halperin, 2014

Huang et al., 2012 84 59 --- --- --- ---

Hultman et al., 2007 1055 100 --- --- --- ---

Hultman et al., 2007 1066 0 --- --- --- ---

Indredavik et al., 2010 146 48 --- --- 35 ---

Jaspers et al., 2013 1664 48 --- --- --- 31

Johnson-Kramer, 1999 36 100 --- --- --- ---

Kadziela-Olech 100 85 --- --- --- ---

Piotrowska-Jastrzebska, 2005

*Appendix 1 continued.*

*Study N Male Caucasian Non-Caucasian Gestational Age Tobacco*

*(%) (%) (%) (weeks) (%)*

Knopik et al., 2005 5,872 0 87 --- --- 37

Kreppner, O’Connor, 214 50 --- --- --- ---

& Rutter, 2001

Lahti et al., 2006 267 46 --- --- --- 9

Langley et al., 2007 356 90 --- --- --- 46

Linnet et al., 2005 4,105 --- --- --- --- 36

McCormick, Gortmaker, 10,522 --- --- --- --- ---

& Sobol, 1990

McGrath et al., 2005 184 50 88 12 32 ---

Melchior et al., 2015 1,113 53 --- --- --- 21

Mick et al., 2002 483 53 96 --- --- 14

Minde, Webb, & Sykes, 112 89 --- --- --- ---

1968

Mitchell, Aman, Turbott, 97 85 --- --- --- ---

& Manku, 1987

Momany et al., 2016 773 56 74 16 --- 10

*Appendix 1 continued.*

*Study N Male Caucasian Non-Caucasian Gestational Age Tobacco*

*(%) (%) (%) (weeks) (%)*

Morales, Polizzi, Sulliotti, 120 46 --- --- 36 ---

Mascolino, & Perricone, 2013

Murray et al., 2015 3,748 52 --- --- --- 27

Nosarti, Allin, Frangou, 116 55 --- --- 34 ---

Rifkin, & Murray, 2005

O’Callaghan & Harvey, 1997 87 31 --- --- 27 ---

Offord, Sullivan, Allen, 63 100 --- --- --- ---

& Abrams, 1979

Parker, Collett, Speltz, & 489 49 75 24 39 16

Werler, 2016

Perkinson-Gloor et al., 2015 105 66 --- --- 34 7

Razza et al., 2016 751 48 --- --- --- ---

Rice et al., 2010 779 --- --- --- --- 5

Rickards, Kelly, Doyle, 161 56 --- --- 32 ---

& Callanan, 2001

Ross, Lipper, & Auld, 1992 168 52 51 45 --- ---

Sasaluxnanon & 241 88 --- --- --- ---

Kawpornsawan, 2005

*Appendix 1 continued.*

*Study N Male Caucasian Non-Caucasian Gestational Age Tobacco*

*(%) (%) (%) (weeks) (%)*

Sato et al., 2004 80 --- --- --- --- ---

Schmitz et al., 2006 200 68 --- --- --- 24

Sciberras, Ukoumunne, 4,464 51 --- --- --- ---

& Efron, 2011

Scott et al., 2012 259 46 40 60 --- ---

Sengupta et al., 2006 191 87 --- --- --- 51

Simonds & Aston, 1980 106 --- --- --- --- ---

Smith et al., 2014 398 83 --- --- 40 ---

St. Sauver et al., 2004 5,631 52 98 --- --- ---

Strang-Karlsson et al., 2008 334 41 100 0 35 18

Sullivan, Msall, & Miller, 180 46 --- --- 33 ---

2012

Sykes et al., 1997 260 0 --- --- --- ---

Sykes et al., 1997 182 100 --- --- --- ---

Szatmari, Saigal, Rosenbaum, 274 46 --- --- --- ---

& Campbell, 1993

*Appendix 1 continued.*

*Study N Male Caucasian Non-Caucasian Gestational Age Tobacco*

*(%) (%) (%) (weeks) (%)*

Taylor, Klein, Minich, 164 32 55 --- --- ---

& Hack, 2000

Van den Bergh & 72 53 --- --- --- ---

Marcoen, 2004

Van Hus, Potharst, 165 45 --- --- 35 ---

Jeukens-Visser, Kok, &

Van Wassenear-Leemhuis,

2014

Wagner, Schmidt, 748 51 --- --- 36 ---

Lemery-Chalfant, Leavitt

& Goldsmith, 2009

Wiles et al., 2006 5,333 --- --- --- --- ---

Williams, 2010 771 48 72 --- --- 29

Yang, Chen, Yen, & Chen, 61 52 --- --- 30 ---

2015
